# Supplementary material for: The Detrimental Clinical Associations of Anxiety and Depression with Difficult Asthma Outcomes
Source: MDPI journal article supplement (doi:10.3390/jpm12050686), 2022-04-26
Supplement: s1 [file s1]

## Online Supplementary Material

**Table S1.** Diagnostic definitions Used in Clinical Practice for Comorbidities.

| Comorbidities                      | Diagnostic Criteria                                                                                                                           |
|------------------------------------|-----------------------------------------------------------------------------------------------------------------------------------------------|
| Rhinitis                           | Physician clinical diagnosis                                                                                                                  |
| Eczema                             | Physician clinical diagnosis                                                                                                                  |
| ABPA                               | Determined clinically using evidence of relevant serological and radiological information guided by conventional clinical diagnostic criteria |
| Bronchiectasis                     | Objective evidence (Radiological Features on any CT imaging of Chest including but not exclusive to HRCT)                                     |
| COPD                               | Physician clinical diagnosis                                                                                                                  |
| GORD                               | Physician clinical diagnosis                                                                                                                  |
| Dysfunctional Breathing            | Physician clinical diagnosis (supported by abnormal Nijmegen score)                                                                           |
| Intermittent Laryngeal Obstruction | Physician clinical diagnosis                                                                                                                  |
| Sulphite Sensitivity               | Physician clinical diagnosis based on compatible history of reaction on exposure and consistent clinical phenotypes                           |
| Salicylate Sensitivity             | Physician clinical diagnosis based on compatible history of reaction on exposure and consistent clinical phenotypes                           |
| Sleep Apnoea                       | Physician clinical diagnosis (confirmed by sleep study)                                                                                       |

ABPA: Allergic Bronchopulmonary Aspergillosis. COPD: Chronic Obstructive Pulmonary Disease. GORD: Gastroesophageal reflux disease.

**Table S2.** Spirometry, FENO, Eosinophil and Total Ige counts of WATCH patients by clinical diagnoses of psychological comorbidity.

|                                                              | Anxiety Alone<br>(N = 35, 6.99%) |              | Depression Alone<br>(N = 51, 10.7%) |              | Dual Anxiety & Depression<br>(N = 104, 20.8%) |         | Control<br>(N = 251, 50.1%) |              |
|--------------------------------------------------------------|----------------------------------|--------------|-------------------------------------|--------------|-----------------------------------------------|---------|-----------------------------|--------------|
|                                                              | Mean (SD)/<br>Median (IQR)       | Miss-<br>ing | Mean (SD)/<br>Median (IQR)          | Miss-<br>ing | Mean (SD)/<br>Median (IQR)                    | Missing | Mean (SD)/<br>Median (IQR)  | Miss-<br>ing |
| FeNO at enrolment, Median (IQR) - ppb                        | 19.0 (24.0)                      | 12           | 12.7 ** (21.7)                      | 8            | 18.9 * (25.4)                                 | 36      | 23.5 (35.5)                 | 86           |
| Total IgE levels at enrolment, Median (IQR) - (KU/I)         | 153 (528)                        | 9            | 54.8 (120)                          | 14           | 75.1 (325)                                    | 30      | 67.1 (229)                  | 81           |
| Eosinophil Count at enrolment, Median (IQR) - cells/ $\mu$ L | 0.20 (0.20)                      | 6            | 0.20 (0.20)                         | 8            | 0.20 (0.30)                                   | 18      | 0.20 (0.20)                 | 53           |
| Pre-BD FEV <sub>1</sub> , Mean (SD) - %                      | 76.2 (22.4)                      | 24           | 54.6 (19.4)**                       | 33           | 69.2 (27.7)                                   | 78      | 74.9 (22.7)                 | 166          |
| Clinic (Post-BD) FEV <sub>1</sub> , Mean (SD) - %            | 75.2 (37.7)                      | 9            | 70.1 (20.3)                         | 15           | 75.1 (21.8)                                   | 38      | 76.2 (23.1)                 | 82           |
| Pre-BD FVC, Mean (SD) - %                                    | 110 (56.6)                       | 23           | 74.6 (20.8)*                        | 33           | 80.5 (24.8)                                   | 78      | 89.5 (20.0)                 | 166          |
| Clinic (Post-BD) FVC, Mean (SD) - %                          | 94.3 (17.1)                      | 9            | 84.1 (17.5)*                        | 15           | 88.8 (16.6)                                   | 38      | 91.5 (19.5)                 | 82           |
| Pre-BD MEF <sub>25-75</sub> , Median (IQR) - %               | 48.7 (66.9)                      | 24           | 23.7 (21.9)**                       | 33           | 44.5 (60.8)                                   | 78      | 43.6 (46.2)                 | 168          |
| Clinic (Post-BD) MEF <sub>25-75</sub> , Median (IQR) - %     | 42.7 (62.7)                      | 9            | 42.8 (41.1)                         | 15           | 47.6 (54.1)                                   | 38      | 47.3 (47.3)                 | 82           |

Significance when compared to the control group: \*:  $p < 0.050$ . \*\*:  $p < 0.005$ . Continuous variables were expressed as median and interquartile range (IQR) or mean and standard deviation (SD). IgE: Immunoglobulin E. FeNO: Fraction exhaled Nitric Oxide. Continuous variables were analyzed with Mann-Whitney U or independent t-tests where appropriate. Categorical variables were analyzed by Chi-squared tests or Fisher's exact test.

**Table S3.** Spirometry and FENO of those with a clinical diagnosis of depression by HADS-D stratification.

|                                                            | HADS-D Normal<br>(0–7)<br>N = 79, 54.1% |              | HADS-D Mild<br>(8–10)<br>N = 25, 17.1% |              | HADS-D Moderate<br>(11–14)<br>N = 30, 20.5% |              | HADS-D Severe<br>(>15)<br>N = 12, 8.2% |              | p-Value |
|------------------------------------------------------------|-----------------------------------------|--------------|----------------------------------------|--------------|---------------------------------------------|--------------|----------------------------------------|--------------|---------|
|                                                            | Mean (SD)/<br>Median (IQR)              | Miss-<br>ing | Mean (SD)/<br>Median (IQR)             | Miss-<br>ing | Mean (SD)/<br>Median (IQR)                  | Miss-<br>ing | Mean (SD)/<br>Median (IQR)             | Miss-<br>ing |         |
| FeNO at enrolment, Median (IQR) - ppb                      | 19.50 (23.35)                           | 18           | 16.5 (19.13)                           | 9            | 17.30 (27.3)                                | 7            | 8.9 (38.98)                            | 2            | 0.627   |
| Pre-BD FEV <sub>1</sub> predicted, Mean (SD) - %           | 74.12 (26.08)                           | 10           | 70.43 (27.86)                          | 10           | 59.43 (38.78)                               | 23           | 78.53 (22.49)                          | 16           | 0.723   |
| Clinic (Post-BD) FEV <sub>1</sub> predicted, Mean (SD) - % | 64.17 (25.07)                           | 29           | 75.72 (21.75)                          | 2            | 80.41 (20.57)                               | 13           | 72.86 (20.11)                          | 4            | 0.598   |
| Pre-BD FVC predicted, Mean (SD) - %                        | 85.85 (24.39)                           | 10           | 86.66 (23.98)                          | 10           | 71.65 (36.56)                               | 23           | 81.64 (17.97)                          | 16           | 0.772   |
| Clinic (Post-BD) FVC predicted, Mean (SD) - %              | 89.02 (18.33)                           | 29           | 86.42 (13.88)                          | 2            | 91.27 (19.17)                               | 13           | 75.99 (17.51)                          | 4            | 0.197   |
| Pre-BD MEF <sub>25-75</sub> , Median (IQR) - %             | 50.58 (57.62)                           | 10           | 48.02 (52.24)                          | 10           | 29.72 (58.12)                               | 23           | 76.84 (114.34)                         | 16           | 0.574   |
| Clinic (Post-BD) MEF <sub>25-75</sub> , Median (IQR) - %   | 40.84 (54.15)                           | 29           | 62.15 (49.42)                          | 2            | 44.39 (44.34)                               | 13           | 49.28 (37.60)                          | 4            | 0.325   |

Continuous variables were expressed in median and interquartile range (IQR) or mean and standard deviation (SD) and analyzed with One-way ANOVA or Kruskal-Wallis test + post-hoc analyses. Categorical variables expressed as Percentage (frequency) and analyzed by Chi-squared tests and post-hoc analyses. BD: Bronchodilator. FEV<sub>1</sub>: forced expiratory volume in one second. FVC: forced vital capacity. MEF<sub>25-75</sub>: Mean Mid Forced Expiratory flow rate. FeNO: Fractional exhaled Nitric Oxide.

**Table S4.** Spirometry and FENO of those with a clinical diagnosis of dual anxiety and depression by HADS-D stratification.

|                                                            | HADS-D Normal<br>(0–7)<br>N = 49, 53.8% |              | HADS-D Mild<br>(8–10)<br>N = 12, 13.2% |              | HADS-D Moderate<br>(11–14)<br>N = 21, 23.1% |              | HADS-D Severe<br>(>15)<br>N = 9, 9.9% |              | p-Value |
|------------------------------------------------------------|-----------------------------------------|--------------|----------------------------------------|--------------|---------------------------------------------|--------------|---------------------------------------|--------------|---------|
|                                                            | Mean (SD)/<br>Median (IQR)              | Miss-<br>ing | Mean (SD)/<br>Median (IQR)             | Miss-<br>ing | Mean (SD)/<br>Median (IQR)                  | Miss-<br>ing | Mean (SD)/<br>Median (IQR)            | Miss-<br>ing |         |
| FeNO at enrolment, Median (IQR) - ppb                      | 21.65 (35.18)                           | 13           | 20.1 (8.95)                            | 6            | 17.8 (30.95)                                | 5            | 19 (37.3)                             | 2            | 0.981   |
| Pre-BD FEV <sub>1</sub> predicted, Mean (SD) - %           | 72.75 (30.06)                           | 34           | 70.13 (30.73)                          | 9            | 71.66 (25.65)                               | 16           | 57.24 (NA)                            | 8            | 0.965   |
| Clinic (Post-BD) FEV <sub>1</sub> predicted, Mean (SD) - % | 75.03 (23.32)                           | 20           | 79.54 (20.52)                          | 1            | 80.89 (19.73)                               | 8            | 68.00 (21.14)                         | 3            | 0.624   |
| Pre-BD FVC predicted, Mean (SD) - %                        | 81.53 (27.64)                           | 34           | 89.93 (13.97)                          | 9            | 83.30 (24.19)                               | 16           | 57.98 (NA)                            | 8            | 0.764   |
| Clinic (Post-BD) FVC predicted, Mean (SD) - %              | <b>91.72</b> (16.65)                    | 20           | 91.94 (13.61)                          | 1            | 92.35 (18.76)                               | 8            | 69.18 (69.16)                         | 3            | 0.020   |
| Pre-BD MEF <sub>25-75</sub> , Median (IQR) - %             | 50.58 (72.45)                           | 34           | 25.46 (NA)                             | 9            | 34.75 (55.8)                                | 16           | 53.41 (NA)                            | 8            | 0.907   |
| Clinic (Post-BD) MEF <sub>25-75</sub> , Median (IQR) - %   | 45.84 (66.71)                           | 20           | 55.92 (65.03)                          | 1            | 46.99 (45.34)                               | 8            | 41.22 (33.69)                         | 3            | 0.666   |

Continuous variables were expressed in median and interquartile range (IQR) or mean and standard deviation (SD) and analyzed with One-way ANOVA or Kruskal-Wallis test + post-hoc analyses. Categorical variables expressed as Percentage (frequency) and analyzed by Chi-squared tests and post-hoc analyses. For significant differences, highest values indicated in bold and lowest in italics.

BD: Bronchodilator. FEV<sub>1</sub>: forced expiratory volume in one second. FVC: forced vital capacity. MEF<sub>25-75</sub>: Mean Mid Forced Expiratory flow rate. FeNO: Fractional exhaled Nitric Oxide.

**Table S5.** Asthma outcomes of those with a clinical diagnosis of anxiety by HADS-A stratification.

|                                                                              | HADS-A Normal<br>(0–7)<br>N =39, 31.7% |              | HADS-A Mild<br>(8–10)<br>N =24, 19.5% |              | HADS-A Moderate<br>(11–14)<br>N =32, 26% |         | HADS-A Severe<br>(>15)<br>N =28, 22.8% |              | p-Value |
|------------------------------------------------------------------------------|----------------------------------------|--------------|---------------------------------------|--------------|------------------------------------------|---------|----------------------------------------|--------------|---------|
|                                                                              | Mean (SD)/<br>Median (IQR)             | Miss-<br>ing | Mean (SD)/<br>Median (IQR)            | Miss-<br>ing | Mean (SD)/<br>Median (IQR)               | Missing | Mean (SD)/<br>Median (IQR)             | Miss-<br>ing |         |
| Number of OCS courses in the past 12 months, Median (IQR)                    | 1.5 (4)                                | 3            | 3 (6)                                 | 1            | 4 (4)                                    | 1       | 3 (5.75)                               | 4            | 0.079   |
| Numbers of days lost from work/education in the past 12 months, Median (IQR) | 1 (14.25)                              | 13           | 9.5 (20)                              | 12           | 5 (50)                                   | 17      | 14 (90)                                | 17           | 0.473   |
| Numbers of hospitalizations the past 12 months, Median (IQR)                 | 0 (1)                                  | 0            | 0 (1)                                 | 1            | 0 (2)                                    | 0       | 0 (1)                                  | 0            | 0.783   |
| ACQ6 at enrolment, Median (IQR)                                              | 2.5 (2)                                | 2            | 3 (1.5)                               | 0            | 3.25 (1.35)                              | 2       | 3.3 (2)                                | 1            | 0.006   |
| SGRQ Score (Symptoms) at enrolment, Mean (SD)                                | 60.51 (18.60)                          | 9            | 73.11 (13.81)                         | 3            | 72.63 (21.67)                            | 1       | 79.69 (11.86)                          | 4            | 0.001   |
| SGRQ Score (Activity) at enrolment, Mean (SD)                                | 64.43 (22.91)                          | 11           | 83.84 (13.70)                         | 4            | 78.58 (13.46)                            | 3       | 92.82 (18.03)                          | 4            | 0.026   |
| SGRQ Score (Impacts) at enrolment, Mean (SD)                                 | 39.78 (17.52)                          | 10           | 53.72 (17.45)                         | 3            | 54.65 (17.08)                            | 3       | 73.36 (18.65)                          | 4            | <0.001  |
| SGRQ Score (Total) at enrolment, Mean (SD)                                   | 51.02 (16.20)                          | 13           | 66.43 (13.85)                         | 4            | 64.65 (13.95)                            | 3       | 80.43 (14.47)                          | 4            | <0.001  |
| FeNO at enrolment, Median (IQR)                                              | 21.15 (45.68)                          | 13           | 20.3 (25.15)                          | 11           | 21.5 (23.7)                              | 7       | 14 (15.18)                             | 8            | 0.225   |
| Pre-BD FEV <sub>1</sub> predicted, Mean (SD) - %                             | 73.93 (24.33)                          | 25           | 66.06 (26.02)                         | 19           | 68.15 (40.72)                            | 26      | 78.41 (19.12)                          | 20           | 0.836   |
| Clinic (Post-BD) FEV <sub>1</sub> predicted, Mean (SD) - %                   | 77.06 (23.21)                          | 12           | 73.63 (24.13)                         | 8            | 71.39 (23.45)                            | 11      | 78.15 (21.47)                          | 10           | 0.774   |
| Pre-BD FVC predicted, Mean (SD) - %                                          | 100 (54.82)                            | 25           | 87.23 (20.81)                         | 19           | 79.95 (38.51)                            | 26      | 85.09 (16.50)                          | 20           | 0.728   |
| Clinic (Post-BD) FVC predicted, Mean (SD) - %                                | 94.85 (15.23)                          | 12           | 91.10 (18.83)                         | 8            | 84.35 (17.97)                            | 11      | 90.39 (16.21)                          | 10           | 0.213   |
| Pre-BD MEF <sub>25-75</sub> , Median (IQR) - %                               | 49.62 (57.64)                          | 25           | 25.46 (52.86)                         | 19           | 40.26 (50.75)                            | 11      | 50.55 (66.45)                          | 20           | 0.626   |
| Clinic (Post-BD) MEF <sub>25-75</sub> , Median (IQR) - %                     | 39.29 (61.17)                          | 12           | 40.95 (61.74)                         | 8            | 35.79 (77.44)                            | 26      | 61.94 (81.73)                          | 10           | 0.440   |
|                                                                              | Percentage<br>(frequency)              | Miss-<br>ing | Percentage<br>(frequency)             | Miss-<br>ing | Percentage<br>(frequency)                | Missing | Percentage<br>(frequency)              | Miss-<br>ing | p-Value |
| ICU admissions for asthma, Ever                                              | 20.5% (8)                              | 0            | 20.8% (5)                             | 0            | 40.6% (13)                               | 0       | 35.7% (10)                             | 0            | 0.185   |
| Intubation for asthma, Ever                                                  | 12.8% (5)                              | 0            | 8.3% (2)                              | 0            | 15.6% (5)                                | 0       | 14.3% (4)                              | 0            | 0.873   |
| On mOCS at enrolment                                                         | 28.6% (10)                             | 4            | 21.7% (5)                             | 1            | 35.7% (10)                               | 4       | 42.9% (12)                             | 0            | 0.397   |

Continuous variables were expressed in median and interquartile range (IQR) or mean and standard deviation (SD) and analyzed with One-way ANOVA or Kruskal-Wallis test + post-hoc analyses. Categorical variables expressed as Percentage (frequency) and analyzed by Chi-squared tests and post-hoc analyses. OCS: oral corticosteroids. ACQ6: asthma control questionnaire 6. BD: Bronchodilator. FEV<sub>1</sub>: forced expiratory volume in one second. FVC: forced vital capacity. MEF<sub>25-75</sub>: Mean Mid Forced Expiratory flow rate. FeNO: Fractional exhaled Nitric Oxide. ICU: Intensive care unit.

**Table S6.** Asthma outcomes of those with a clinical diagnosis of anxiety dual anxiety and depression by HADS-A stratification.

|                                                                              | <b>HADS-A Normal<br/>(0-7)<br/>N = 26, 28.9%</b> |                | <b>HADS-A Mild<br/>(8-10)<br/>N = 14, 15.6%</b> |                | <b>HADS-A Moderate<br/>(11-14)<br/>N = 28, 31.1%</b> |                | <b>HADS-A Severe<br/>(&gt;15)<br/>N = 22, 24.4%</b> |                | <b>p-Value</b> |
|------------------------------------------------------------------------------|--------------------------------------------------|----------------|-------------------------------------------------|----------------|------------------------------------------------------|----------------|-----------------------------------------------------|----------------|----------------|
|                                                                              | <b>Mean (SD)/<br/>Median (IQR)</b>               | <b>Missing</b> | <b>Mean (SD)/<br/>Median (IQR)</b>              | <b>Missing</b> | <b>Mean (SD)/<br/>Median (IQR)</b>                   | <b>Missing</b> | <b>Mean (SD)/<br/>Median (IQR)</b>                  | <b>Missing</b> |                |
| Number of OCS courses in the past 12 months, Median (IQR)                    | 1.5 (3)                                          | 2              | 3.5 (6.25)                                      | 0              | 3.5 (4.75)                                           | 0              | 3 (7.25)                                            | 4              | 0.299          |
| Numbers of days lost from work/education in the past 12 months, Median (IQR) | 2 (13)                                           | 10             | 5 (20)                                          | 7              | 7.5 (53.25)                                          | 14             | 14 (60)                                             | 13             | 0.433          |
| Numbers of hospitalizations the past 12 months, Median (IQR)                 | 0 (1)                                            | 0              | 0 (1)                                           | 0              | 0 (2)                                                | 0              | 0 (1)                                               | 0              | 0.656          |
| ACQ6 at enrolment, Median (IQR)                                              | 2.4 (2.1)                                        | 0              | 3 (1.88)                                        | 0              | 3.2 (1.15)                                           | 2              | 3.3 (1.6)                                           | 1              | 0.018          |
| SGRQ Score (Symptoms) at enrolment, Mean (SD)                                | 61.72 (20.84)                                    | 2              | 71.13 (13.85)                                   | 1              | 76.19 (14.87)                                        | 4              | 75.12 (14.88)                                       | 3              | 0.017          |
| SGRQ Score (Activity) at enrolment, Mean (SD)                                | 66.80 (24.71)                                    | 2              | 72.10 (19.70)                                   | 1              | 73.22 (19.09)                                        | 6              | 82.76 (15.98)                                       | 4              | 0.108          |
| SGRQ Score (Impacts) at enrolment, Mean (SD)                                 | 37.81 (17.39)                                    | 2              | 51.77 (19.16)                                   | 1              | 53.80 (18.17)                                        | 5              | 59.85 (17.90)                                       | 4              | 0.001          |
| SGRQ Score (Total) at enrolment, Mean (SD)                                   | 50.53 (17.21)                                    | 1              | 61.18 (15.38)                                   | 1              | 63.54 (16.22)                                        | 6              | 69.10 (14.12)                                       | 4              | 0.003          |
| FeNO at enrolment, Median (IQR)                                              | 22.5 (45.83)                                     | 10             | 20.15 (51)                                      | 4              | 22 (22)                                              | 5              | 12.7 (15.7)                                         | 7              | 0.117          |
| Pre-BD FEV <sub>1</sub> predicted, Mean (SD) - %                             | 74.12 (26.08)                                    | 10             | 70.43 (27.86)                                   | 10             | 59.43 (38.78)                                        | 23             | 78.53 (22.49)                                       | 16             | 0.723          |
| Clinic (Post-BD) FEV <sub>1</sub> predicted, Mean (SD) - %                   | 79.67 (22.15)                                    | 17             | 76.66 (24.71)                                   | 4              | 71.70 (21.33)                                        | 10             | 77.21 (20.72)                                       | 8              | 0.758          |
| Pre-BD FVC predicted, Mean (SD) - %                                          | 85.85 (24.39)                                    | 10             | 86.66 (23.98)                                   | 10             | 71.65 (36.56)                                        | 23             | 81.64 (17.97)                                       | 16             | 0.772          |
| Clinic (Post-BD) FVC predicted, Mean (SD) - %                                | 96 (16.20)                                       | 17             | 92.30 (21)                                      | 4              | 83.28 (15.13)                                        | 10             | 87.76 (17.17)                                       | 8              | 0.174          |
| Pre-BD MEF <sub>25-75</sub> , Median (IQR) - %                               | 50.58 (57.62)                                    | 10             | 48.02 (52.24)                                   | 10             | 29.72 (58.12)                                        | 23             | 76.84 (114.34)                                      | 16             | 0.574          |
| Clinic (Post-BD) MEF <sub>25-75</sub> , Median (IQR) - %                     | 47.10 (65.21)                                    | 17             | 36.87 (66.14)                                   | 4              | 41.22 (47.50)                                        | 10             | 51.94 (79.83)                                       | 8              | 0.635          |

|                                 | Percentage (frequency) | Missing | p-Value |
|---------------------------------|------------------------|---------|------------------------|---------|------------------------|---------|------------------------|---------|---------|
| ICU admissions for asthma, Ever | 15.4% (4)              | 0       | 14.3% (2)              | 0       | 42.9% (12)             | 0       | 36.4% (8)              | 0       | 0.071   |
| Intubation for asthma, Ever     | 0% (0)                 | 0       | 7.1% (1)               | 0       | 17.9% (5)              | 0       | 13.6% (3)              | 0       | 0.154   |
| On mOCS at enrolment            | 30.4% (7)              | 3       | 28.6% (4)              | 0       | 37.5% (9)              | 4       | 40.9% (9)              | 0       | 0.833   |

Continuous variables were expressed in median and interquartile range (IQR) or mean and standard deviation (SD) and analyzed with One-way ANOVA or Kruskal-Wallis test + post-hoc analyses. Categorical variables expressed as Percentage (frequency) and analyzed by Chi-squared tests and post-hoc analyses. OCS: oral corticosteroids. ACQ6: asthma control questionnaire 6. BD: Bronchodilator. FEV<sub>1</sub>: forced expiratory volume in one second. FVC: forced vital capacity. MEF<sub>25-75</sub>: Mean Mid Forced Expiratory flow rate. FeNO: Fractional exhaled Nitric Oxide. ICU: Intensive care unit.

**Table S7.** Clinical characteristics of those with Severe psychological comorbidities vs No psychological comorbidities.

|                                                                              | Severe psychological comorbidities<br>N = 36 |         | No psychological comorbidities<br>N = 149 |         | p-Value |
|------------------------------------------------------------------------------|----------------------------------------------|---------|-------------------------------------------|---------|---------|
|                                                                              | Mean (SD)/Median (IQR)                       | Missing | Mean (SD)/Median (IQR)                    | Missing |         |
| Age, Median (IQR)- years                                                     | 52.0 (23.0)                                  | 0       | 59.0 (21.0)                               | 0       | 0.013   |
| Age of asthma onset, Median (IQR) - years                                    | 20.0 (30.5)                                  | 3       | 24.0 (41.0)                               | 8       | 0.142   |
| Body Mass Index, Median (IQR) – kgm <sup>-2</sup>                            | 31.2 (12.2)                                  | 1       | 27.9 (7.40)                               | 1       | 0.005   |
| Number of exacerbations in the past 12 months, Median (IQR)                  | 3.00 (5.00)                                  | 5       | 2.00 (3.00)                               | 12      | 0.092   |
| Numbers of days lost from work/education in the past 12 months, Median (IQR) | 16.0 (48.8)                                  | 22      | 4.00 (14.0)                               | 61      | 0.026   |
| Numbers of hospitalizations the past 12 months, Median (IQR)                 | 0.00 (1.00)                                  | 0       | 0.00 (0.00)                               | 1       | 0.720   |
| Duration of asthma, Median (IQR) - years                                     | 26 (16)                                      | 3       | 24 (31)                                   | 8       | 0.649   |
| ACQ6 at enrolment, Median (IQR)                                              | 3.50 (1.90)                                  | 1       | 2.00 (1.80)                               | 6       | <0.001  |
| SGRQ Score (Symptoms) at enrolment, Mean (SD)                                | 73.58 (15.25)                                | 5       | 57.98 (23.19)                             | 17      | <0.001  |
| SGRQ Score (Activity) at enrolment, Mean (SD)                                | 81.91 (17.14)                                | 6       | 50.12 (25.29)                             | 27      | <0.001  |
| SGRQ Score (Impacts) at enrolment, Mean (SD)                                 | 60.18 (16.93)                                | 6       | 29.36 (17.56)                             | 23      | <0.001  |
| SGRQ Score (Total) at enrolment, Mean (SD)                                   | 68.85 (13.86)                                | 6       | 40.61 (18.26)                             | 31      | <0.001  |
| Nijmegen score, Median (IQR)                                                 | 37.0 (12.0)                                  | 5       | 13.0 (11.8)                               | 25      | <0.001  |
| FeNO at enrolment, Median (IQR) (PPB)                                        | 68.6 (16.2)                                  | 9       | 26.7 (33.0)                               | 48      | 0.015   |
| Pre-BD FEV <sub>1</sub> predicted, Mean (SD) - %                             | 72.7 (20.7)                                  | 25      | 74.4 (20.4)                               | 100     | 0.804   |
| Clinic (Post-BD) FEV <sub>1</sub> predicted, Mean (SD) - %                   | 79.5 (20.8)                                  | 12      | 74.7 (22.3)                               | 43      | 0.331   |
| Pre-BD FVC predicted, Mean (SD) - %                                          | 83.1 (20.1)                                  | 25      | 90.9 (19.7)                               | 100     | 0.245   |
| Clinic (Post-BD) FVC predicted, Mean (SD) - %                                | 88.3 (16.7)                                  | 12      | 91.3 (18.7)                               | 43      | 0.481   |
| Pre-BD MEF 25-75, median (IQR)                                               | 44.2 (69.8)                                  | 25      | 43.5 (44.2)                               | 102     | 0.913   |
| Clinic (Post-BD) MEF 25-75, median (IQR)                                     | 51.1 (72.2)                                  | 12      | 46.6 (45.9)                               | 43      | 0.232   |
|                                                                              | Percentage (frequency)                       | Missing | Percentage (frequency)                    | Missing | p-Value |
| Sex, Male                                                                    | 30.6% (11)                                   | 0       | 47.7% (71)                                | 0       | 0.064   |
| Body Mass Index ≥30, Ever                                                    | 62.9% (22)                                   | 1       | 38.5% (57)                                | 1       | 0.009   |
| Smoked, Ever                                                                 | 66.7% (24)                                   | 0       | 36.2% (54)                                | 0       | 0.001   |
| Adult-onset (≥18) asthma, Ever                                               | 42.4% (14)                                   | 3       | 44.0% (62)                                | 8       | 0.872   |
| Dysfunctional breathing, Ever                                                | 74.3% (26)                                   | 1       | 36.6% (53)                                | 4       | <0.001  |
| Allergic Rhinitis, Ever                                                      | 19.6% (11)                                   | 4       | 31.7% (45)                                | 7       | 0.769   |
| GORD, Ever                                                                   | 34.4% (11)                                   | 6       | 45.2% (66)                                | 7       | 0.005   |
| Other Psychological co-morbidity, Ever                                       | 17.9% (5)                                    | 8       | 4.7% (6)                                  | 17      | 0.013   |
| Intermittent laryngeal obstruction, Ever                                     | 14.3% (4)                                    | 8       | 11.7% (16)                                | 12      | 0.751   |

|                                      |            |    |            |    |       |
|--------------------------------------|------------|----|------------|----|-------|
| Nasal Polyposis, Ever                | 13.9% (5)  | 0  | 29.8% (42) | 8  | 0.054 |
| COPD, Ever                           | 8.6% (3)   | 1  | 10.2% (15) | 2  | 1.000 |
| ABPA, Ever                           | 2.9% (1)   | 3  | 10.9% (16) | 2  | 0.203 |
| Bronchiectasis, Ever                 | 5.6% (2)   | 2  | 19.0% (28) | 2  | 0.063 |
| Urticaria/Angioedema, Ever           | 8.8% (3)   | 5  | 10.2% (15) | 17 | 1.000 |
| Sulphite sensitivity, Ever           | 0.00% (0)  | 3  | 7.5% (11)  | 13 | 0.220 |
| Salicylate sensitivity, Ever         | 25.7% (9)  | 13 | 23.3% (34) | 3  | 0.762 |
| Eczema, Ever                         | 11.4% (4)  | 1  | 25.9% (38) | 2  | 0.069 |
| Obstructive Sleep Apnoea, Ever       | 15.2% (5)  | 8  | 4.8% (7)   | 3  | 0.047 |
| ICU admissions for asthma, Ever      | 33.3% (12) | 0  | 27.5% (41) | 0  | 0.488 |
| Intubation for asthma, Ever          | 11.1% (4)  | 0  | 14.1% (21) | 0  | 0.790 |
| On maintenance OCS at enrolment, Yes | 45.7% (16) | 1  | 37.3% (53) | 7  | 0.362 |
| On Biologics at Enrolment, Yes       | 11.1% (4)  | 0  | 22.8% (34) | 0  | 0.119 |

Severe psychological comorbidities= those with a clinical diagnosis of anxiety / depression + 'Severe' HADS-A /HADS-D. No psychological comorbidities = no anxiety, no depression + normal HADS-A and normal HADS-D. Continuous variables were expressed in median and interquartile range (IQR) or mean and standard deviation (SD) and analyzed with independent samples *t*-test or Mann-Whitney U tests. Categorical variables expressed as Percentage (frequency) and analyzed by Chi-squared tests. OCS: oral corticosteroids. ACQ6: asthma control questionnaire 6. COPD: Chronic Obstructive Pulmonary Disease. ABPA: Allergic Bronchopulmonary Aspergillosis. GORD: Gastro-esophageal reflux disease. BD: Bronchodilator. FEV<sub>1</sub>: forced expiratory volume in one second. FVC: forced vital capacity. MEF<sub>25-75</sub>: Mean Mid Forced Expiratory flow rate. FENO: Fractional exhaled Nitric Oxide. ICU: Intensive care unit.
